# Supplementary material
Source: publisher figshare collection journal article supplement (https://karger.figshare.com/articles/dataset/_/5387968)
Supplement: Supplementary file 2 [file 1]

Archive with 4 entries (4 files):
- JIN479817_FigS1.pdf
- JIN479817_FigS1-S3_Legends.docx
- JIN479817_FigS2.pdf
- JIN479817_FigS3.pdf
