# Supplementary material
Source: publisher figshare collection journal article supplement (https://karger.figshare.com/articles/dataset/_/5387968)
Supplement: Supplementary file 2 [file 1 › JIN479817_FigS1-S3_Legends.docx]

**Suppl. Fig. 1. Phenotype assessment of galectin-9 conditioned moDC.** MoDC were conditioned with galectin-9 and moDC phenotype was evaluated. MoDC conditioned with galectin-9 did not show an altered phenotype compared to control moDC based on the expression of CD11b, CD11c, DC-SIGN and HLA-DR (A). Data represent 6-8 independent PBMC donors. (White, isotype control; light grey, control moDC; dark grey, galectin-9 conditioned moDC)

**Suppl. Fig. 2. Phenotype assessment of GM-BMDC and FL-BMDC stimulated with galectin-9.** Bone marrow cells from WT C57Bl/6 mice were differentiated into BMDC using GM-CSF or Flt3L for 7 days, followed by stimulation with galectin-9 for 24h. In GM-BMDC, galectin-9 did not affect the expression of CD11b and CD11c in CD11c+F4/80- cells, while I-A/I-E expression was increased on GM-BMDC stimulated with galectin-9. GM-BMDC did not express B220 (A). In FL-BMDC, exposure to galectin-9 led to an up-regulation of CD11b, CD11c and I-A/I-E, while the expression of B220 appeared to be reduced (B). Data are representative for 3 independent BMDC cultures.

**Suppl. Fig. 3. Exposure of splenic cDC cultures to galectin-9, GM-CSF or a combination of galectin-9 and GM-CSF does not alter the frequency of cDC subsets in culture.** Splenic CD11c+ cells were enriched and exposed to galectin-9, GM-CSF or a combination of galectin-9 and GM-CSF for 24h. The frequency of CD11b+CD8- and CD11blowCD8+ cDC subsets in culture was assessed. The frequency of CD11b+CD8- and CD11blowCD8+ DC in culture was not altered upon exposure to galectin-9, GM-CSF or the combination of galectin-9 and GM-CSF. Data are representative for separate cultures of 3 individual spleens, mean ± SEM.
