# Supplementary material
Source: publisher figshare collection journal article supplement (https://karger.figshare.com/articles/dataset/_/5387968)

# Supplementary Figure 3

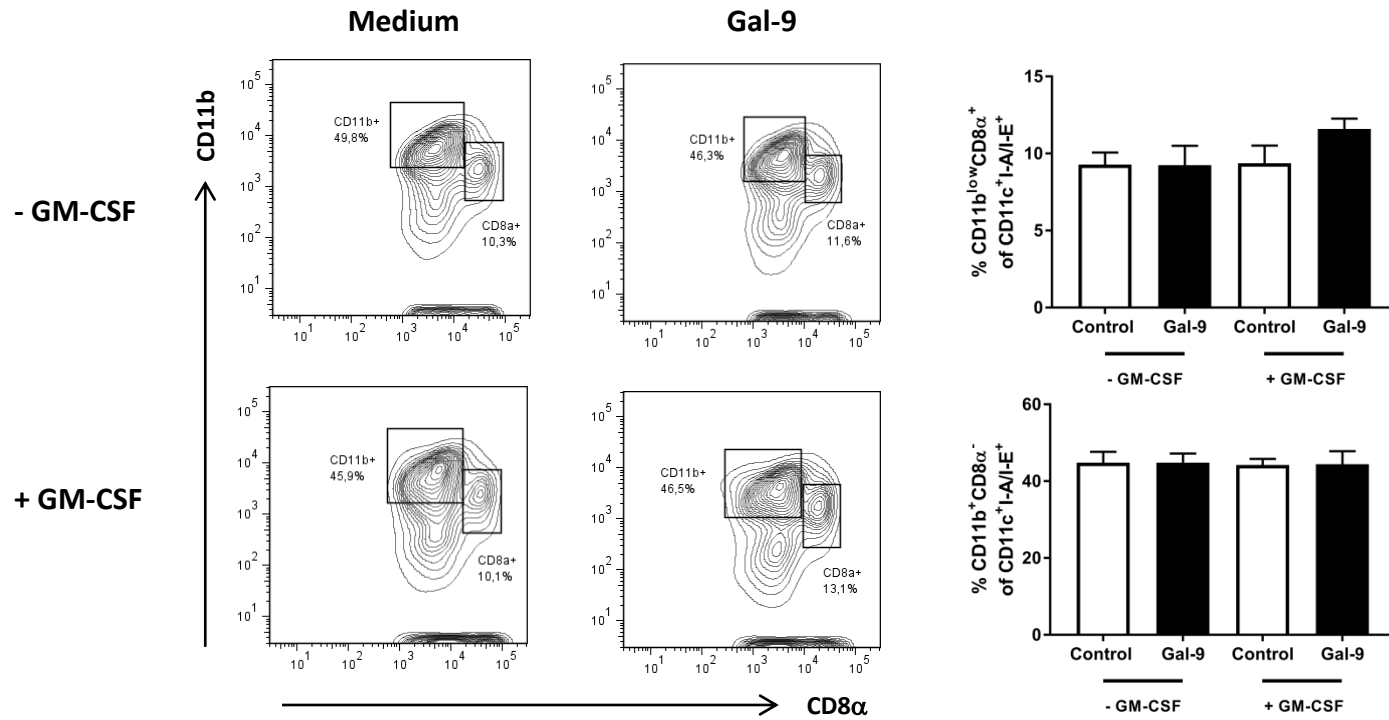

Supplement: Supplementary file 1 [file 1]

## Supplementary Figure 1

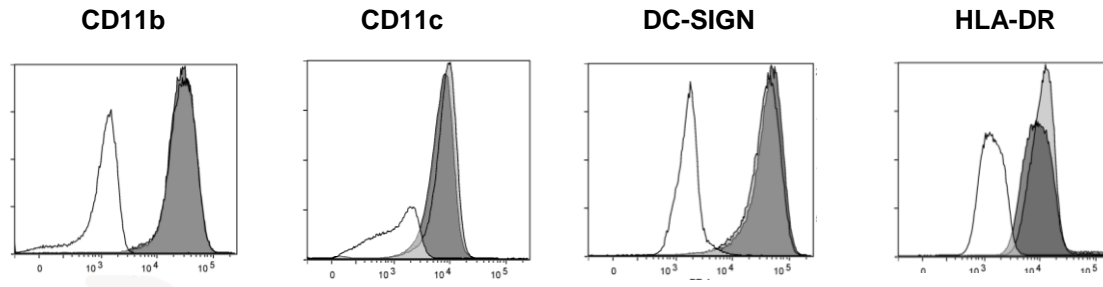

Supplement: Supplementary file 2 [file 1 › JIN479817_FigS1.pdf]

**CD11c<sup>+</sup>F4/80<sup>-</sup> cells**

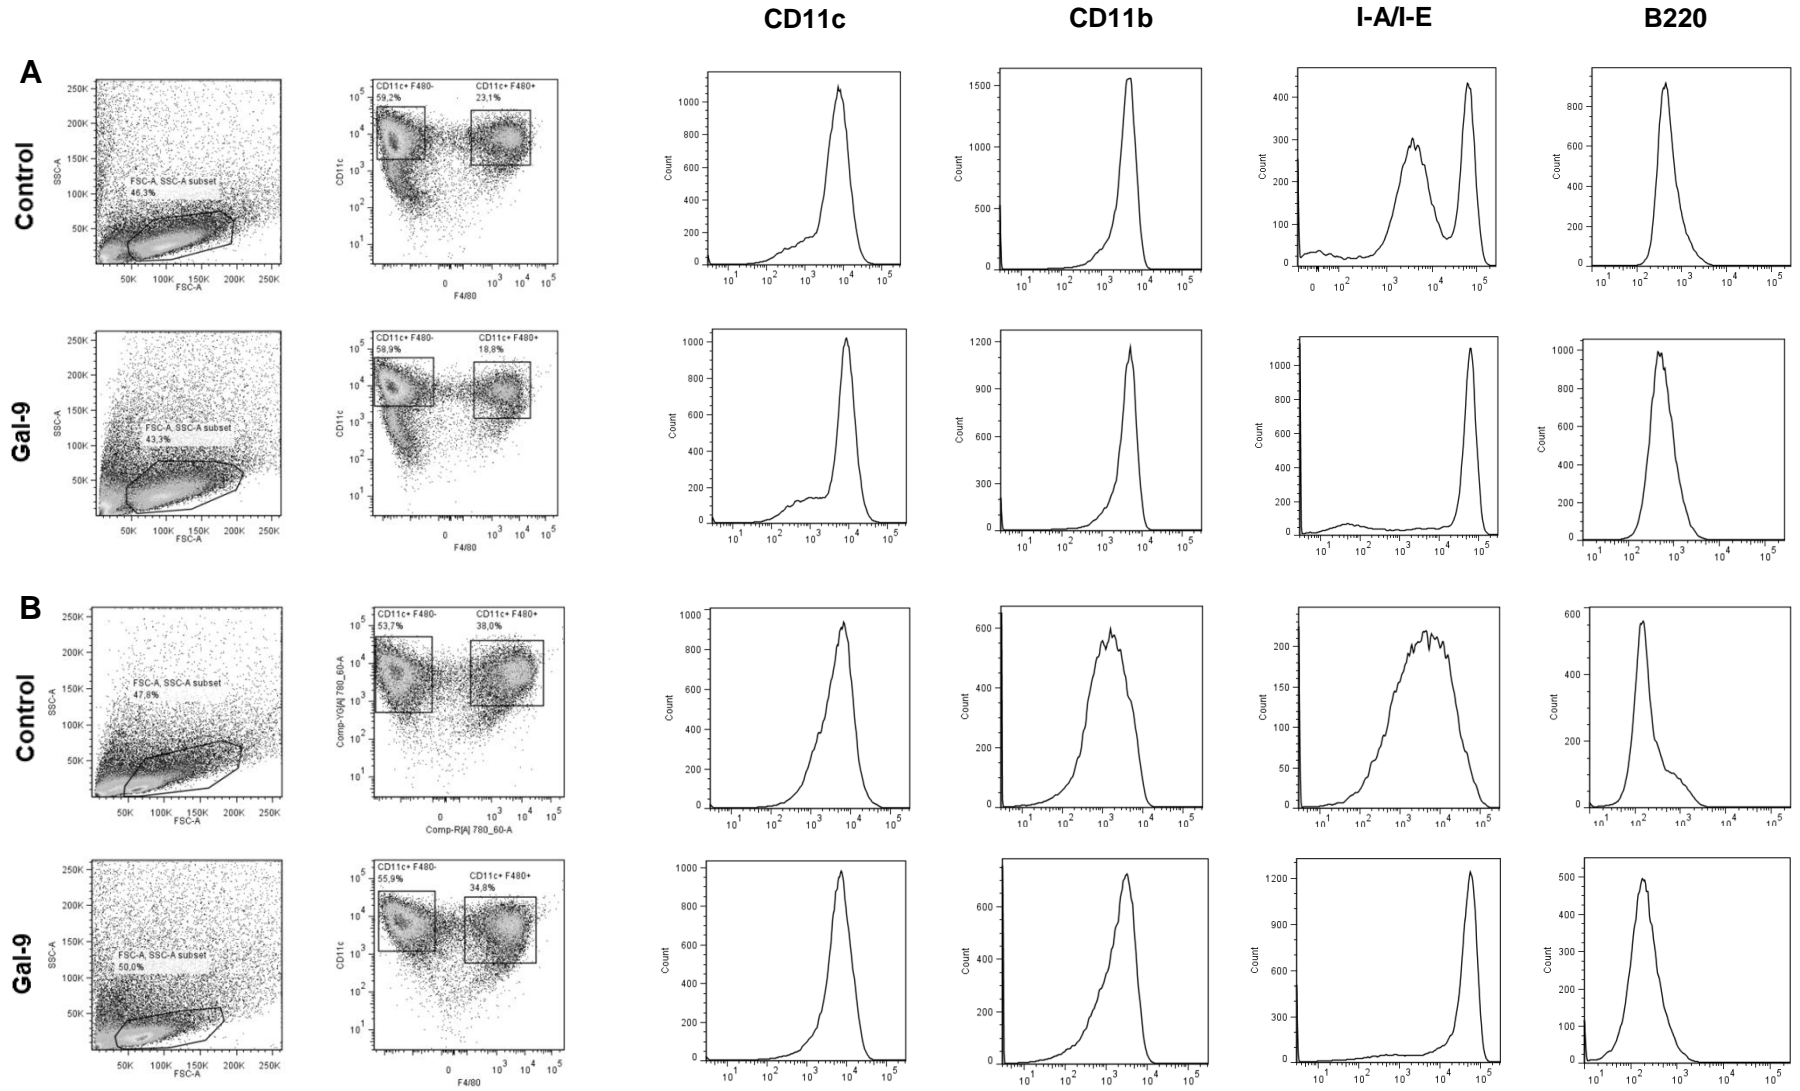

Supplement: Supplementary file 2 [file 1 › JIN479817_FigS2.pdf]
